# Supplementary material for: Biomass-based quantum dots co-doped with sulfur and nitrogen for highly sensitive detection of thrombin and its inhibitor
Source: Royal Society of Chemistry journal article supplement (doi:10.1039/c9nj02359c), 2019-01-01
Supplement: c9nj02359c1.pdf [file c9nj02359c1.pdf]

## Electronic Supporting Information (ESI)

### **Biomass-based quantum dots co-doped with sulfur and nitrogen for highly sensitive detection of thrombin and inhibitor**

Yuefang Hu<sup>a,b</sup>, Jingjin Zhao<sup>a</sup>, Xuefeng Li<sup>a</sup>, Shulin Zhao<sup>a,\*</sup>

<sup>a</sup> State Key Laboratory for the Chemistry and Molecular Engineering of Medicinal Resources, Guangxi Normal University, Guilin 541004, China

<sup>b</sup> College of Materials and Chemical engineering, Hezhou University, Hezhou 542899, China

## 1. The measurement of quantum yield

The fluorescence quantum yield (QY) of the S,N-BQDs was obtained by following function:

$$\Phi = \Phi_{\text{ref}} \times (I_{\text{sam}}/I_{\text{ref}}) \times (A_{\text{ref}}/A_{\text{sam}}) \times (\eta_{\text{sam}}^2/\eta_{\text{ref}}^2)$$

Quinine sulfate (0.1 M H<sub>2</sub>SO<sub>4</sub> as a solvent) was chosen as a standard. Where  $\Phi$  is the QY, I is the measured integrated emission intensity, A and  $\eta$  are the optical density and refractive index, respectively. The subscript “ref” refers to standard with known  $\Phi$ , and “sam” refers to the samples.

## 2. Supplementary Figures

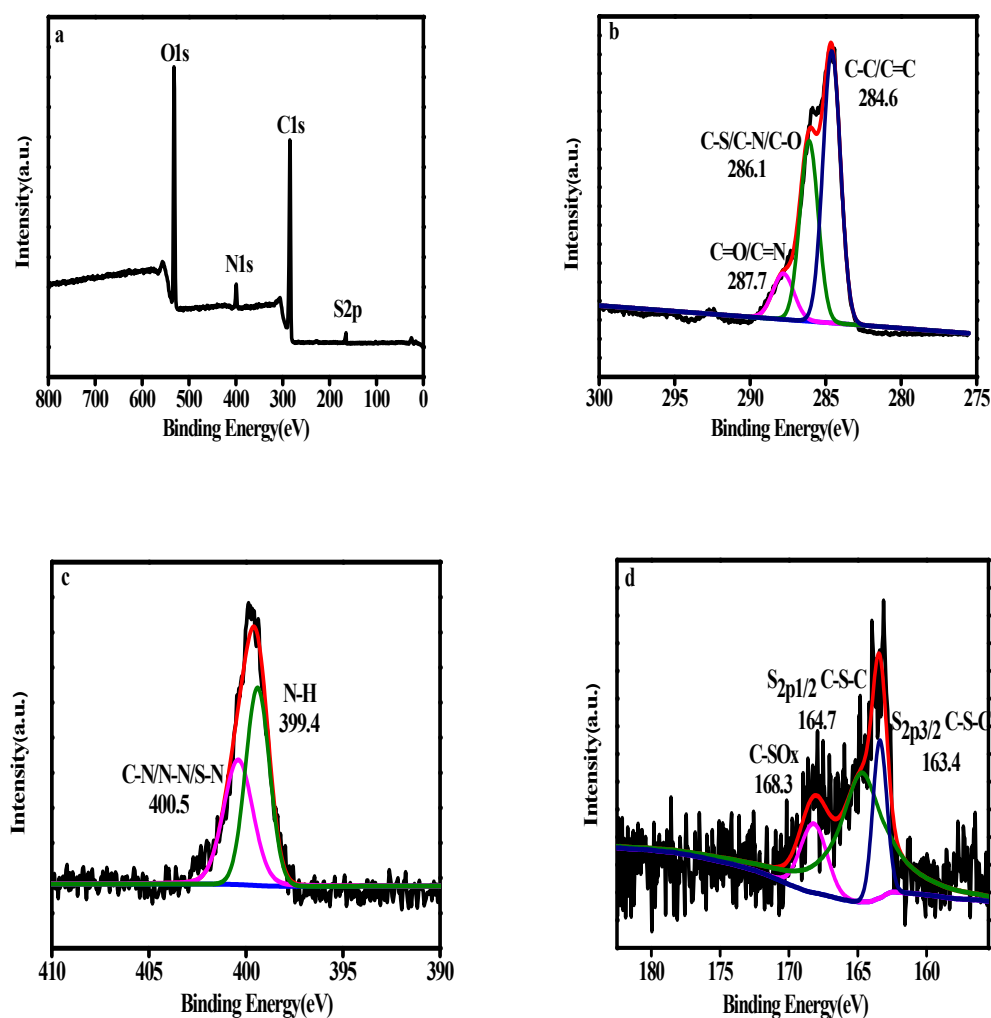

**Fig. S1.** XPS spectrum of S, N-BQDs (a) and high-resolution spectra of C1s, N1s and S2p.

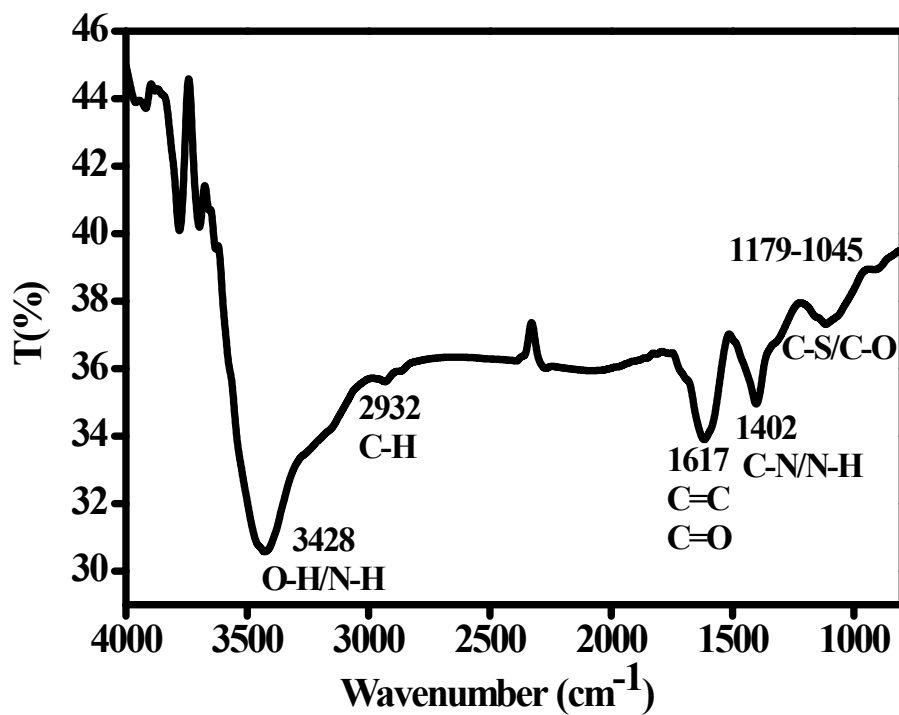

Fig. S2. FTIR spectrum of S, N-BQDs.

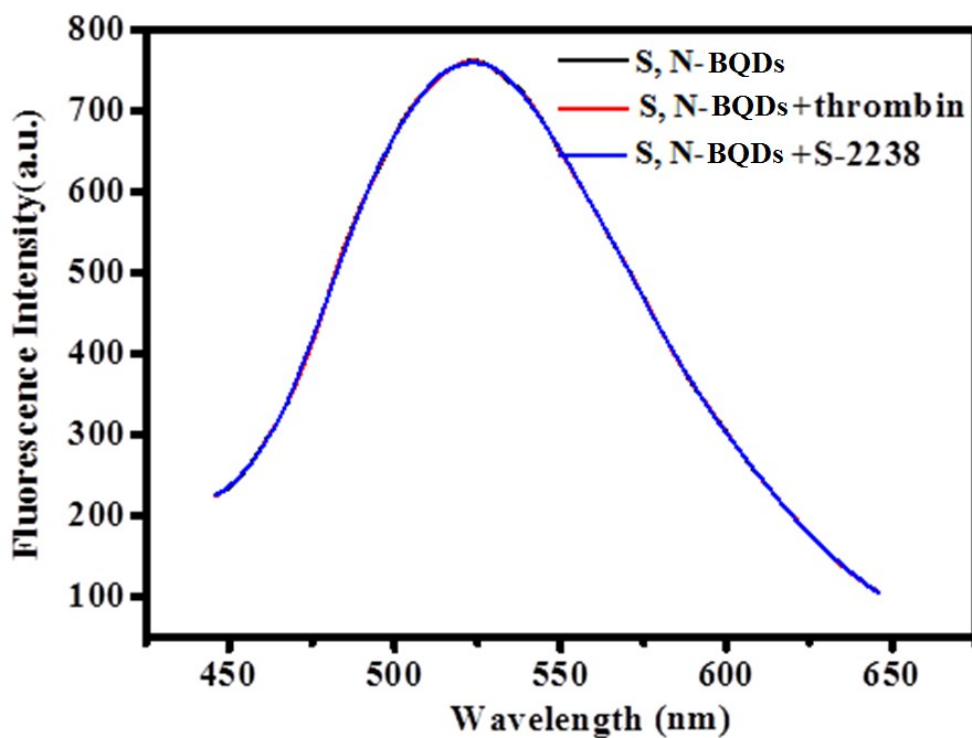

Fig. S3. The effect of thrombin or S-2238 on the fluorescence spectrum of S, N-BQDs.

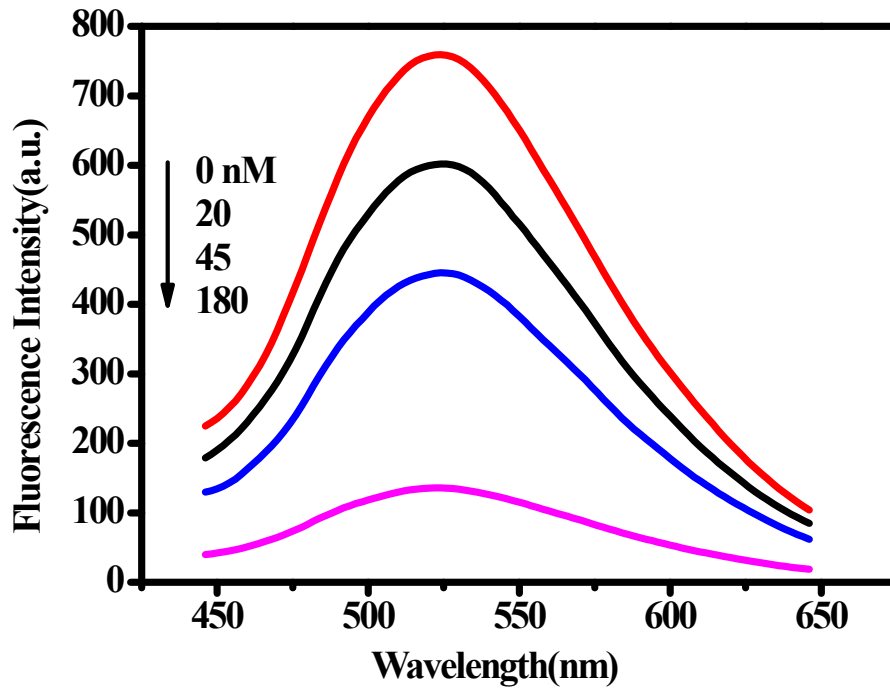

**Fig. S4.** The fluorescence spectra of the S, N-BQDs upon addition of various concentrations of thrombin from 0 to 180 nM with 2 mM S-2238.

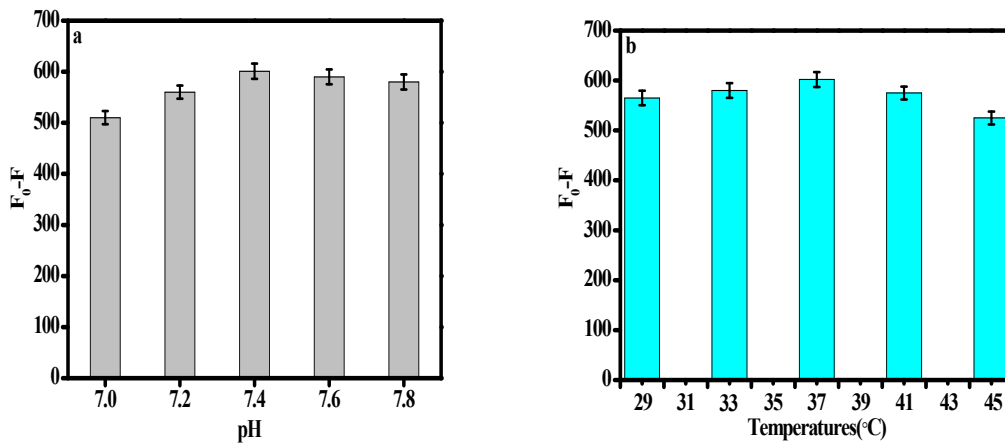

**Fig. S5.** The effects of Tris-HCl buffer pH (a) and incubating temperatures (b) on IFE based fluorescence assay.

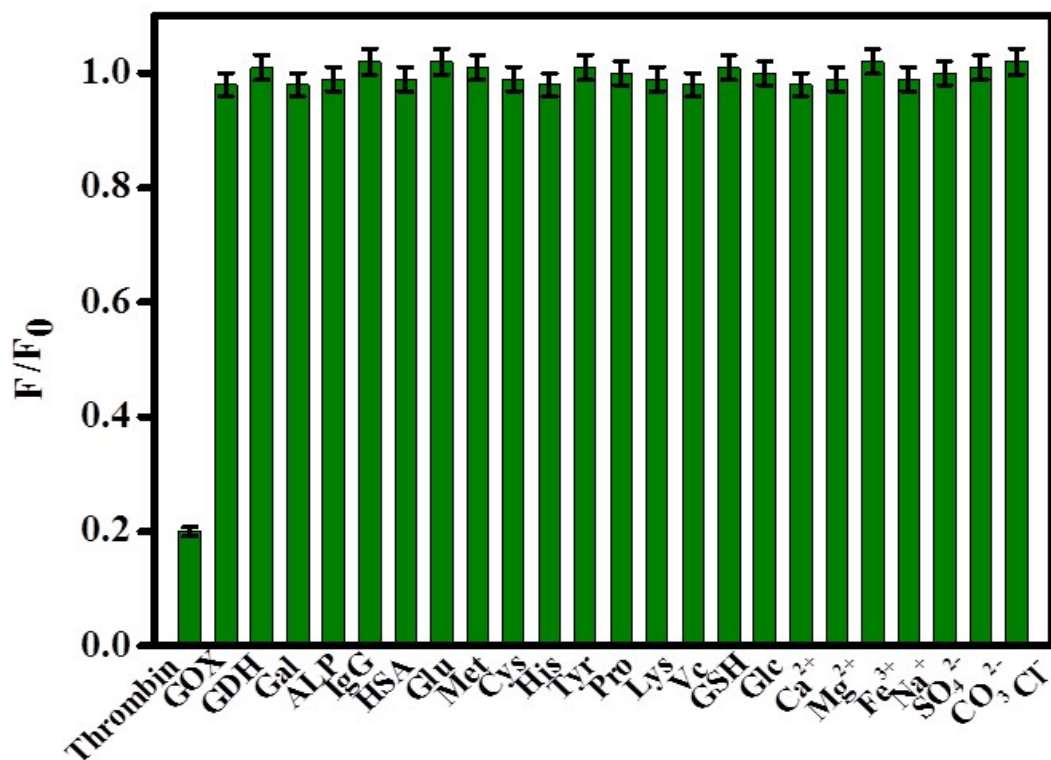

**Fig. S6.** The selectivity of thrombin assays in the presence of possible coexistence substances. The levels of GOX, GDH, Gal, and ALP were 10 U/L, and the concentrations of HSA and IgG were 150 mg/L. The concentrations of thrombin, Vc, GSH and amino acids were 0.1 mM, and the concentrations of metal ions and anion were 0.01 mM.  $F_0$  and  $F$  are the fluorescence intensities of S, N-BQDs in the absence and presence of the possible coexistence substances, respectively.

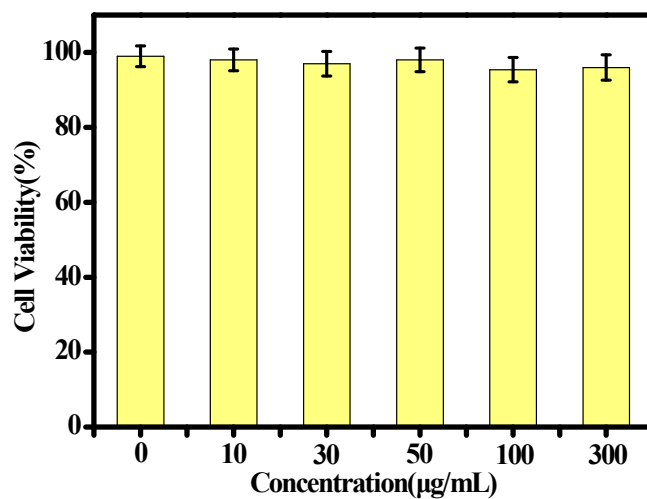

**Fig. S7.** Cells viability after incubation with S, N-BQDs for 24 h.

### 3. Supplementary Table

**Table S1** Comparison of different methods used for thrombin detection

| Method                                        | Linear range(nM) | LOD (nM) | Reference   |
|-----------------------------------------------|------------------|----------|-------------|
| FRET assay                                    | 0-100            | 11       | 1           |
| FRET assay                                    | 0-35             | 0.59     | 2           |
| FRET assay                                    | 0-60             | 0.5      | 3           |
| Fluorescence correlation spectroscopy         | 0.5-110          | 0.5      | 4           |
| FRET assay                                    | 0.5-20           | 0.18     | 5           |
| Conjugated polyelectrolyte fluorescence assay | –                | 0.175    | 6           |
| Surface plasmon resonance assay               | 0.1-75           | 0.1      | 7           |
| IFE fluorescence assay                        | 0.1-65           | 0.03     | This method |

#### References

1. Wang, C., Zhai, W., Wang, Y., Yu, P., Mao, L., 2015. *Analyst* 140, 4021-4029.
2. Kuang, L., Cao, S. P., Zhang, L., 2016. *Biosens. Bioelectron.* 85, 798-806.
3. Yu, J.M., Yang, L.R., Liang, X. F., Dong, T. T., Liu, H.Z., 2015. *Analyst* 140, 4114-4120.
4. Xu, Z., Huang, X., Dong, C., 2014. *Microchim. Acta.* 181, 723-730.
5. Wang, Y., Bao, L., Liu, Z., Pang, D. W., 2011. *Anal. Chem.* 83, 8130-8137.
6. Kim, D., Lee, T. S., 2014. *Chem. Commun.* 50, 5833-5836.
7. Bai, Y., Feng, F., Zhao, L., 2013. *Biosens. Bioelectron.* 47, 265-270.
